# Supplementary material
Source: PubMed Central journal article supplement (PMC4191765)
Supplement: pnas.201413970SI.pdf [file pnas.201413970SI.pdf]

# Supporting Information

Hao et al. 10.1073/pnas.1413970111

## Numerical Methods

To illustrate our numerical method we consider the following diffusion equation:

$$\frac{\partial X}{\partial t} - D_X \nabla^2 X = F_X \text{ in } \Omega, \quad [\text{S1}]$$

where the right-hand side accounts for all of the “active” terms. Let  $X_{ij}^n$  denote a numerical approximation of  $X(ih_x, jh_y, n\tau)$ , where  $h_x$  and  $h_y$  are the step size in the  $x$  and  $y$  directions, respectively, and  $\tau$  is the time step size. Then, a discretization is derived by the explicit Euler five-point finite difference scheme, that is,

$$\frac{X_{ij}^{n+1} - X_{ij}^n}{\tau} - D_X \left( \frac{X_{i+1,j}^n + X_{i-1,j}^n - 2X_{i,j}^n}{h_x^2} + \frac{X_{i,j+1}^n + X_{i,j-1}^n - 2X_{i,j}^n}{h_y^2} \right) = F_X(X_{i,j}^n) \text{ in } \Omega. \quad [\text{S2}]$$

To make the scheme stable, we take  $\tau \leq h^2/4D_X$ , namely  $\tau = 0.1(h^2/D_X)$ , where  $h = h_x = h_y$ . To test the convergence, we take  $h = 1/N$ , where  $n = 10, 20, 40, 80, 160$ , and  $320$ . The “exact” solution is taken to be the solution with  $h = 640$ . The solution is computed up to  $t = 60$  d and the  $L_2$  error of the velocity and numerical order of accuracy are listed in Table S1. We can clearly observe the second-order accuracy in this table.

## Parameter Estimation

A summary of all of the model parameters is given in Tables S2 and S3.

### Eq. 4.

- $d_E$ : Corneal epithelial half life is at least 4–5 wk (1). We take the tubular epithelial half-life to be 6 wk. Then,  $d_E = \ln(2)/42 = 1.65 \times 10^{-2} \text{ d}^{-1}$ .
- $E^*$ : We assume that the tubular radius is 10  $\mu\text{m}$  and that the tubules occupy up to 90% of the renal cortex. Accordingly, the density of the tubular epithelial cell (TEC) in healthy tissue is taken to be  $E^* = 0.8 \text{ g/mL}$ .
- $A_E$ : The steady state of Eq. 4 in healthy tissue is  $A_E - d_E E^* = 0$ . Hence,  $A_E = 8.27 \times 10^{-3} \text{ g}\cdot\text{cm}^{-3}\cdot\text{d}^{-1}$ .
- $d_{EM}$ : The TECs are decreased by the activated macrophages. Assuming that if  $M$  is large, after a long period the TEC density will decrease by 10% even if TGF- $\beta$  is not activated. Accordingly,  $d_{EM} = 1/10d_E = 1.65 \times 10^{-3} \text{ d}^{-1}$ .
- $K_{T_\beta}$ : Based on ref. 2, the concentration of TGF- $\beta$  in tumor microenvironment was estimated to be about 10 ng/mL. Because tumors secrete a large amount of TGF- $\beta$ ,  $K_{T_\beta}$  in our model should be significantly smaller; we take  $K_{T_\beta} = 10^{-10} \text{ g/cm}^3$ .
- $\lambda_{ET_\beta}$ : We assume that the increase of TEC apoptosis by macrophages is double the natural apoptosis rate when TGF- $\beta$  is approximately at its saturation value; hence,  $\lambda_{ET_\beta} = 2$ .

### Eq. 5.

- $A_f$ : Fibroblasts make up 7% of healthy renal tissue (3), so that

$$f^* = 7 \times 10^{-2} \text{ g/cm}^3.$$

The steady state of Eq. 5 in healthy tissue is  $A_f - d_f f = 0$ . Because  $d_f = 1.66 \times 10^{-2} \text{ d}^{-1}$  (4), we get

$$A_f = d_f f^* \approx 1.66 \times 10^{-2} \times 7 \times 10^{-2} = 1.16 \times 10^{-3} \text{ g/cm}^3 \text{ d}^{-1}.$$

- $\lambda_{mfT}$ : In the cancer microenvironment, the transformation from fibroblast to myofibroblast by TGF- $\beta$  was represented in ref. 5 by the term  $a_{21}T_\beta f$ , where  $a_{21} = 6 \times 10^2 \text{ cm}^3\cdot\text{g}^{-1}\cdot\text{s}^{-1}$ . We assume that in our model myofibroblast production rate is smaller than in ref. 5; this rate in our model has the form  $\lambda_{mfT}(T_\beta/K_{T_\beta} + T_\beta)f$  and, to compare this with  $a_{21}T_\beta f$ , we take the inhibition  $K_{T_\beta} + T_\beta$  to be  $3/2K_{T_\beta}$ . We then choose  $\lambda_{mfT}$  such that

$$\lambda_{mfT} \frac{T_\beta}{2K_{T_\beta}} f = \frac{1}{10} a_{21} T_\beta f.$$

Hence,  $\lambda_{mfT} = 0.12 \text{ d}^{-1}$ .

- $\lambda_{mfG}$ : We assume that PDGF and TGF- $\beta$  affect the transformation from  $f$  to  $m$  to approximately the same extent (6–8) and take  $\lambda_{mfG} = \lambda_{mfT}$ .
- $\lambda_{fE}$ : We assume that in the absence of PDGF the production of fibroblasts by TEC is approximately twice the transformation of fibroblasts into myofibroblasts, that is,  $\lambda_{fE}E = 2\lambda_{mfT}f$ , and take  $\lambda_{fE}$  by setting  $E = E^*$ ,  $f = f^*$ ; then  $\lambda_{fE} = 1.05 \times 10^{-2} \text{ d}^{-1}$ .

### Eq. 7.

- $\lambda_{\rho T_\beta}$ : We assume that TGF- $\beta$  doubles the production of ECM by myofibroblast when TGF- $\beta$  is approximately at its saturation value. Hence,  $\lambda_{\rho T_\beta} = 2$ .
- $\lambda_{\rho f}$ : In the cancer microenvironment, the remodeling rate of ECM is  $0.432 \text{ d}^{-1}$  (9). We assume that in renal fibrosis the remodeling rate is much smaller and take  $\lambda_{\rho f} = 3 \times 10^{-3} \text{ d}^{-1}$ . We also assume that the production rate of ECM by myofibroblasts is twice the production rate by fibroblasts (in the absence of TGF- $\beta$ ), namely,  $\lambda_{\rho m} = 2\lambda_{\rho f} = 6 \times 10^{-3}$ .
- $\rho^*$ : The steady state of  $\rho$ ,  $\rho^*$  is determined by solving the following steady-state equation in a healthy renal tissue:

$$\lambda_{\rho f} f \left( 1 - \frac{\rho}{\rho_0} \right) - d_\rho \rho = 0.$$

Taking  $f = f^*$ ,  $\rho_0 = 10^{-3} \text{ g/cm}^3$  (9), and  $d_\rho = 0.37 \text{ d}^{-1}$  (10), we get  $\rho^* = 3.62 \times 10^{-4} \text{ g/cm}^3$ .

### Eq. 8.

- $K_P$ : In ref. 11 it was demonstrated that renal epithelial cells, in response to inflammation by crystals of calcium oxalate monohydrate and excess oxalate ions, secrete monocyte chemoattractant protein-1 (MCP-1) at levels of at least 267 pg/mL, which is  $\sim 0.3$  ng/mL. We assume that in patients with renal fibrosis the MCP-1 saturation can reach up to 5 ng/mL and take  $K_P = 5 \times 10^{-9} \text{ g/mL}$ .
- $\lambda_{PM}$ : The degradation rate of MCP-1 is  $d_P = 1.73 \text{ d}^{-1}$  (12). We assume that, when  $M$  and  $P$  are large, the production of MCP-1 by macrophages is three times larger than the degradation of MCP-1, that is,  $\lambda_{PM}M_0 = 3d_P K_P$ . Because  $M_0 = 5 \times 10^{-5} \text{ g/cm}^3$  (13), we get  $\lambda_{PM} = 3d_P K_P / M_0 = 3 \times 10^{-3} \text{ d}^{-1}$ .
- $d_{PM}$ : MCP-1 internalized by macrophages. We assume that the rate of internalization is smaller by a factor of 1/10 than

the rate of production by macrophages when  $M$  are  $P$  are large, so that

$$d_{PM} = 1/10\lambda_{PM};$$

hence,  $d_{PM} = 2.08 \times 10^{-4} \text{ d}^{-1}$ .

1. Cenedella RJ, Fleschner CR (1990) Kinetics of corneal epithelium turnover in vivo. Studies of lovastatin. *Invest Ophthalmol Vis Sci* 31(10):1957–1962.
2. Kipari T, et al. (2006) Nitric oxide is an important mediator of renal tubular epithelial cell death in vitro and in murine experimental hydronephrosis. *Am J Pathol* 169(2):388–399.
3. Strutz F, Zeisberg M (2006) Renal fibroblasts and myofibroblasts in chronic kidney disease. *J Am Soc Nephrol* 17(11):2992–2998.
4. Weissman-Shomer P, Fry M (1975) Chick embryo fibroblasts senescence in vitro: Pattern of cell division and life span as a function of cell density. *Mech Ageing Dev* 4(2):159–166.
5. Kim Y, Wallace J, Li F, Ostrowski M, Friedman A (2010) Transformed epithelial cells and fibroblasts/myofibroblasts interaction in breast tumor: A mathematical model and experiments. *J Math Biol* 61(3):401–421.
6. Masur SK, Dewal HS, Dinh TT, Erenburg I, Petridou S (1996) Myofibroblasts differentiate from fibroblasts when plated at low density. *Proc Natl Acad Sci USA* 93(9):4219–4223.
7. Midgley AC, et al. (2013) Transforming growth factor- $\beta$ 1 (TGF- $\beta$ 1)-stimulated fibroblast to myofibroblast differentiation is mediated by hyaluronan (HA)-facilitated

**Eq. 12.**

- $\lambda_{T\beta M}$ : In the cancer microenvironment, the production rate of TGF- $\beta$  by TECs is  $1.7 \times 10^{-4} \text{ d}^{-1}$  (5). We assume that in our model the production rate by macrophages is much larger and take  $\lambda_{T\beta M} = 1.5 \times 10^{-2} \text{ d}^{-1}$ .

- epidermal growth factor receptor (EGFR) and CD44 co-localization in lipid rafts. *J Biol Chem* 288(21):14824–14838.
8. Singh V, Barbosa FL, Torricelli AA, Santhiago MR, Wilson SE (2014) Transforming growth factor  $\beta$  and platelet-derived growth factor modulation of myofibroblast development from corneal fibroblasts in vitro. *Exp Eye Res* 120:152–160.
9. Kim Y, Roh S, Lawler S, Friedman A (2011) miR451 and AMPK mutual antagonism in glioma cell migration and proliferation: A mathematical model. *PLoS ONE* 6(12):e28293.
10. Xue C, Friedman A, Sen CK (2009) A mathematical model of ischemic cutaneous wounds. *Proc Natl Acad Sci USA* 106(39):16782–16787.
11. Umekawa T, Chegini N, Khan SR (2002) Oxalate ions and calcium oxalate crystals stimulate MCP-1 expression by renal epithelial cells. *Kidney Int* 61(1):105–112.
12. Chen D, Roda JM, Marsh CB, Eubank TD, Friedman A (2012) Hypoxia inducible factors-mediated inhibition of cancer by GM-CSF: A mathematical model. *Bull Math Biol* 74(11):2752–2777.
13. Tietz NW (1999) *Clinical Guide to Laboratory Tests* (Saunders, Philadelphia), 3rd Ed.

**Table S1. Accuracy of numerical method**

| $N$ | $L_2$ error | Order |
|-----|-------------|-------|
| 20  | 1.09e-1     |       |
| 40  | 3.39e-2     | 1.69  |
| 80  | 1.01e-2     | 1.75  |
| 160 | 2.75e-3     | 1.87  |
| 320 | 7.11e-4     | 1.95  |

**Table S2. Parameter descriptions and values**

| Parameter             | Description                                           | Value and refs.                                                                    |
|-----------------------|-------------------------------------------------------|------------------------------------------------------------------------------------|
| $D_M$                 | Dispersion coefficient of macrophages                 | $8.64 \times 10^{-7} \text{ cm}^2 \cdot \text{d}^{-1}$ (1, 2)                      |
| $D_P$                 | Diffusion coefficient of MCP-1                        | $1.728 \times 10^{-1} \text{ cm}^2 \cdot \text{d}^{-1}$ (3)                        |
| $D_G$                 | Diffusion coefficient of PDGF                         | $8.64 \times 10^{-2} \text{ cm}^2 \cdot \text{d}^{-1}$ (4)                         |
| $D_Q$                 | Diffusion coefficient of MMP                          | $4.32 \times 10^{-2} \text{ cm}^2 \cdot \text{d}^{-1}$ (5, 6)                      |
| $D_{Q_r}$             | Diffusion coefficient for TIMP                        | $4.32 \times 10^{-2} \text{ cm}^2 \cdot \text{d}^{-1}$ (5, 6)                      |
| $D_{T_\beta}$         | Diffusion coefficient for TGF- $\beta$                | $4.32 \times 10^{-2} \text{ cm}^2 \cdot \text{d}^{-1}$ (5)                         |
| $D_f$                 | Dispersion coefficient of fibroblasts                 | $1.47 \times 10^{-6} \text{ cm}^2 \cdot \text{d}^{-1}$ (7)                         |
| $D_m$                 | Dispersion coefficient of myofibroblasts              | $1.47 \times 10^{-5} \text{ cm}^2 \cdot \text{d}^{-1}$ (7)                         |
| $\lambda_{ET_\beta}$  | Rate of TEC apoptosis enhanced by TGF- $\beta$        | (5) estimated                                                                      |
| $\lambda_{T_\beta M}$ | Production rate of TGF- $\beta$ by macrophages        | $1.5 \times 10^{-2} \text{ d}^{-1}$ (7) and estimated                              |
| $\lambda_{GM}$        | Production rate of PDGF by macrophages                | $2.4 \times 10^{-5} \text{ d}^{-1}$ (4)                                            |
| $\lambda_{QM}$        | Production rate of MMP by macrophages                 | $3 \times 10^{-4} \text{ d}^{-1}$ (2)                                              |
| $\lambda_{Q,M}$       | Production rate of TIMP by macrophages                | $6 \times 10^{-5} \text{ d}^{-1}$ (2, 6)                                           |
| $\lambda_{PE}$        | Activation rate of MCP-1 due to TECs                  | $1 \times 10^{-8} \sim 1 \times 10^{-7} \text{ d}^{-1}$ (6) and estimated          |
| $\lambda_{PM}$        | Activation rate of MCP-1 due to macrophages           | $3 \times 10^{-3} \text{ d}^{-1}$ estimated                                        |
| $\lambda_{pf}$        | Activation rate of ECM due to fibroblasts             | $3 \times 10^{-3} \text{ d}^{-1}$ (2) and estimated                                |
| $\lambda_{pm}$        | Activation rate of ECM due to myofibroblasts          | $6 \times 10^{-3} \text{ d}^{-1}$ (2) and estimated                                |
| $\lambda_{pT_\beta}$  | Activation rate of ECM due to TGF- $\beta$            | (5) estimated                                                                      |
| $\lambda_{fE}$        | Activation rate of fibroblasts due to TECs            | $1.2 \times 10^{-2} \text{ d}^{-1}$ (7) and estimated                              |
| $\lambda_{mfT}$       | Activation rate of myofibroblasts due to TGF- $\beta$ | $0.12 \text{ d}^{-1}$ (7) and estimated                                            |
| $\lambda_{mfG}$       | Activation rate of myofibroblasts due to PDGF         | $0.12 \text{ d}^{-1}$ (7) and estimated                                            |
| $d_M$                 | Death rate of macrophages                             | $0.015 \text{ d}^{-1}$ (8)                                                         |
| $d_E$                 | Death rate of TECs                                    | $1.65 \times 10^{-2} \text{ d}^{-1}$ estimated                                     |
| $d_{EM}$              | Increased death rate of TECs by macrophages           | $1.65 \times 10^{-3} \text{ d}^{-1}$ (9) and estimated                             |
| $d_p$                 | Degradation rate of ECM                               | $0.37 \text{ d}^{-1}$ (4)                                                          |
| $d_P$                 | Degradation rate of MCP-1                             | $1.73 \text{ d}^{-1}$ (3)                                                          |
| $d_{PM}$              | Internalization rate of MCP-1 by macrophages          | $2.08 \times 10^{-4} \text{ d}^{-1}$ (3)                                           |
| $d_G$                 | Degradation rate of PDGF                              | $3.84 \text{ d}^{-1}$ (4)                                                          |
| $d_{Q,Q_r}$           | Binding rate of MMP to TIMP                           | $4.98 \times 10^8 \text{ cm}^3 \cdot \text{g}^{-1} \cdot \text{d}^{-1}$ (3, 6, 10) |
| $d_{Q_r,Q}$           | Binding rate of TIMP to MMP                           | $1.04 \times 10^9 \text{ cm}^3 \cdot \text{g}^{-1} \cdot \text{d}^{-1}$ (3, 6, 10) |
| $d_Q$                 | Degradation rate of MMP                               | $4.32 \text{ d}^{-1}$ (11)                                                         |
| $d_{Q_r}$             | Degradation rate of TIMP                              | $21.6 \text{ d}^{-1}$ (6, 12)                                                      |
| $d_{p,Q}$             | Degradation rate of ECM due to MMP                    | $2.59 \times 10^7 \text{ cm}^3 \cdot \text{g}^{-1} \cdot \text{d}^{-1}$ (1)        |
| $d_{T_\beta}$         | Degradation rate of TGF- $\beta$                      | $3.33 \times 10^2 \text{ d}^{-1}$ (13)                                             |
| $d_f$                 | Death rate of fibroblasts                             | $1.66 \times 10^{-2} \text{ d}^{-1}$ (14)                                          |
| $d_m$                 | Death rate of myofibroblasts                          | $1.66 \times 10^{-2} \text{ d}^{-1}$ (14)                                          |

MMP, matrix metalloproteinase; TIMP, tissue inhibitor of metalloproteinase.

- Mercapide J, Lopez De Cicco R, Castresana JS, Klein-Szanto AJ (2003) Stromelysin-1/matrix metalloproteinase-3 (MMP-3) expression accounts for invasive properties of human astrocytoma cell lines. *Int J Cancer* 106(5):676–682.
- Miller CC, et al. (2003) Validation of a morphometric method for evaluating fibroblast numbers in normal and pathologic tissues. *Exp Dermatol* 12(4):403–411.
- Umekawa T, Chegini N, Khan SR (2002) Oxalate ions and calcium oxalate crystals stimulate MCP-1 expression by renal epithelial cells. *Kidney Int* 61(1):105–112.
- Kim Y, Roh S, Lawler S, Friedman A (2011) miR451 and AMPK mutual antagonism in glioma cell migration and proliferation: a mathematical model. *PLoS ONE* 6(12):e28293.
- Strutz F, Zeisberg M (2006) Renal fibroblasts and myofibroblasts in chronic kidney disease. *J Am Soc Nephrol* 17(11):2992–2998.
- Bowen-Pope DF, Malpass TW, Foster DM, Ross R (1984) Platelet-derived growth factor in vivo: Levels, activity, and rate of clearance. *Blood* 64(2):458–469.
- Wakefield LM, et al. (1990) Recombinant latent transforming growth factor beta 1 has a longer plasma half-life in rats than active transforming growth factor beta 1, and a different tissue distribution. *J Clin Invest* 86(6):1976–1984.
- Midgley AC, et al. (2013) Transforming growth factor- $\beta$ 1 (TGF- $\beta$ 1)-stimulated fibroblast to myofibroblast differentiation is mediated by hyaluronan (HA)-facilitated epidermal growth factor receptor (EGFR) and CD44 co-localization in lipid rafts. *J Biol Chem* 288(21):14824–14838.
- Singh V, Barbosa FL, Torricelli AA, Santhiago MR, Wilson SE (2014) Transforming growth factor  $\beta$  and platelet-derived growth factor modulation of myofibroblast development from corneal fibroblasts in vitro. *Exp Eye Res* 120:152–160.
- Xue C, Friedman A, Sen CK (2009) A mathematical model of ischemic cutaneous wounds. *Proc Natl Acad Sci USA* 106(39):16782–16787.
- Kim Y, Lawler S, Nowicki MQ, Chiocia EA, Friedman A (2009) A mathematical model for pattern formation of glioma cells outside the tumor spheroid core. *J Theor Biol* 260(3):359–371.
- Chen D, Roda JM, Marsh CB, Eubank TD, Friedman A (2012) Hypoxia inducible factors-mediated inhibition of cancer by GM-CSF: A mathematical model. *Bull Math Biol* 74(11):2752–2777.
- Wakefield L, et al. (1990) Recombinant latent transforming growth factor beta 1 has a longer plasma half-life in rats than active transforming growth factor beta 1, and a different tissue distribution. *J Clin Invest* 86(6):1976–1984.
- Tietz NW (1999) *Clinical Guide to Laboratory Tests* (Saunders, Philadelphia), 3rd Ed.

**Table S3. Parameter descriptions and values**

| Parameter     | Description                                      | Value and refs.                                                                               |
|---------------|--------------------------------------------------|-----------------------------------------------------------------------------------------------|
| $\chi_P$      | Chemotactic sensitivity parameter by MCP-1       | $10 \text{ cm}^5 \cdot \text{g}^{-1} \cdot \text{d}^{-1}$ (1, 2)                              |
| $A_E$         | Intrinsic TEC proliferation                      | $8.27 \times 10^{-3} \text{ g} \cdot \text{cm}^{-3} \cdot \text{d}^{-1}$ estimated            |
| $A_f$         | Intrinsic fibroblast proliferation               | $1.16 \times 10^{-3} \text{ g} \cdot \text{cm}^{-3} \cdot \text{d}^{-1}$ (3, 4) and estimated |
| $K_Q$         | MMP saturation for activation of scar            | $3 \times 10^{-8} \text{ g} \cdot \text{cm}^{-3}$ (5, 6)                                      |
| $K_G$         | PDGF saturation for activation of myofibroblasts | $1.5 \times 10^{-1} \text{ g} \cdot \text{cm}^{-3}$ (6, 7)                                    |
| $K_M$         | Macrophage saturation for apoptosis of TECs      | $5 \times 10^{-5} \text{ g} \cdot \text{cm}^{-3}$ (8)                                         |
| $K_{T_\beta}$ | TGF- $\beta$ saturation for inhibition of TECs   | $1 \times 10^{-10} \text{ g} \cdot \text{cm}^{-3}$ (9)                                        |
| $K_P$         | MCP-1 saturation for influx of macrophages       | $5 \times 10^{-9} \text{ g} \cdot \text{cm}^{-3}$ (10)                                        |
| $\rho_0$      | ECM saturation                                   | $10^{-3} \text{ g} \cdot \text{cm}^{-3}$ (11)                                                 |
| $\rho^*$      | ECM density in health                            | $3.62 \times 10^{-4} \text{ g} \cdot \text{cm}^{-3}$ estimated                                |
| $E^*$         | TEC density in health                            | $0.8 \text{ g} \cdot \text{cm}^{-3}$ estimated                                                |
| $f^*$         | Fibroblast density in health                     | $0.07 \text{ g} \cdot \text{cm}^{-3}$ (12) and estimated                                      |
| $M_0$         | Source/influx of macrophages from blood          | $5 \times 10^{-5} \text{ g} \cdot \text{cm}^{-3}$ (8)                                         |
| $\alpha$      | Influx rate of macrophages into interstitium     | $0.2 \text{ cm}^{-1}$ (6)                                                                     |

- Kim Y, Lawler S, Nowicki MO, Chiocca EA, Friedman A (2009) A mathematical model for pattern formation of glioma cells outside the tumor spheroid core. *J Theor Biol* 260(3):359–371.
- Mercapide J, Lopez De Cicco R, Castresana JS, Klein-Szanto AJ (2003) Stromelysin-1/matrix metalloproteinase-3 (MMP-3) expression accounts for invasive properties of human astrocytoma cell lines. *Int J Cancer* 106(5):676–682.
- Hao W, Friedman A (2014) Cholesterol levels determine plaque formation in arteries: A mathematical model. *PLoS ONE* 9(3):e90497.
- Friedman A, Turner J, Szomolay B (2008) A model on the influence of age on immunity to infection with Mycobacterium tuberculosis. *Exp Gerontol* 43(4):275–285.
- Palosaari H, Ylipisto O (2003) Matrix metalloproteinases (MMPs) and their specific tissue inhibitors (TIMPs) in mature human odontoblasts and pulp tissue. *Eur J Oral Sci* 111(2):117–127.
- Bowen-Pope DF, Malpass TW, Foster DM, Ross R (1984) Platelet-derived growth factor in vivo: Levels, activity, and rate of clearance. *Blood* 64(2):458–469.
- Kim Y, Friedman A (2010) Interaction of tumor with its micro-environment: A mathematical model. *Bull Math Biol* 72(5):1029–1068.
- Gattorno M, et al. (1998) Serum interleukin 12 concentration in juvenile chronic arthritis. *Ann Rheum Dis* 57(7):425–428.
- Wakefield LM, et al. (1990) Recombinant latent transforming growth factor beta 1 has a longer plasma half-life in rats than active transforming growth factor beta 1, and a different tissue distribution. *J Clin Invest* 86(6):1976–1984.
- Kipari T, et al. (2006) Nitric oxide is an important mediator of renal tubular epithelial cell death in vitro and in murine experimental hydronephrosis. *Am J Pathol* 169(2):388–399.
- Miller CC, et al. (2003) Validation of a morphometric method for evaluating fibroblast numbers in normal and pathologic tissues. *Exp Dermatol* 12(4):403–411.
- Uhal BD, et al. (1998) Cell size, cell cycle, and alpha-smooth muscle actin expression by primary human lung fibroblasts. *Am J Physiol* 275(5 Pt 1):L998–L1005.

**Table S4. Patient data for different levels of interstitial fibrosis based on kidney biopsy**

| Damage | Patient index | uTGFb* | uMCP1* | % fibrosis | INF <sup>†</sup> | Patient index | uTGFb* | uMCP1*  | % fibrosis | INF <sup>†</sup> |   |
|--------|---------------|--------|--------|------------|------------------|---------------|--------|---------|------------|------------------|---|
| Low    | 1             | 0.018  | 0.78   | 0          | 1                | 2             | 0.056  | 1.14    | 0          | 1                |   |
|        | 3             | 0.089  | 1.4    | 0          | 1                | 4             | 0.223  | 2.27    | 0          | 2                |   |
|        | 5             | 0.005  | 1.1    | 0          | 1                | 6             | 0.003  | 0.33    | 0          | 1                |   |
|        | 7             | 0.101  | 1.94   | 0          | 1                | 8             | 0.053  | 0.82    | 0          | 1                |   |
|        | 9             | 0.0016 | 0.7    | 0          | 1                | 10            | 0.034  | 0.51    | 2          | 1                |   |
|        | 11            | 0.029  | 1.33   | 2          | 1                | 12            | 0.268  | 4.12    | 2          | 2                |   |
|        | 13            | 0.056  | 0.95   | 2          | 1                | 14            | 0.014  | 0.75    | 5          | 1                |   |
|        | 15            | 0.002  | 2.23   | 5          | 2                | 16            | 0.072  | 1.756   | 5          | 1                |   |
|        | 17            | 0.033  | 1.5    | 5          | 1                | 18            | 0.0007 | 0.81    | 5          | 1                |   |
|        | 19            | 0.0055 | 1.24   | 5          | 1                |               |        |         |            |                  |   |
|        | Intermediate  | 20     | 0.084  | 3.94       | 10               | 2             | 21     | 0.038   | 6.26       | 10               | 1 |
|        |               | 22     | 0.502  | 3.5        | 10               | 1             | 23     | 0.0046  | 0.2        | 10               | 1 |
|        |               | 24     | 0.0009 | 0.78       | 10               | 1             | 25     | 0.00097 | 0.5        | 10               | 1 |
|        |               | 26     | 0.0058 | 1.24       | 10               | 1             | 27     | 0.021   | 0.58       | 10               | 1 |
|        |               | 28     | 0.126  | 4.41       | 10               | 2             | 29     | 0.004   | 2.2        | 10               | 2 |
|        |               | 30     | 1.42   | 2          | 15               | 1             | 31     | 0.021   | 0.73       | 15               | 1 |
|        |               | 32     | 0.035  | 2.18       | 17.5             | 1             | 33     | 0.788   | 21.4       | 20               | 1 |
| 34     |               | 0.0009 | 0.53   | 20         | 1                | 35            | 0.001  | 0.36    | 20         | 1                |   |
| 36     |               | 0.0019 | 2.1    | 25         | 1                | 37            | 0.0035 | 0.33    | 25         | 1                |   |
| 38     |               | 0.002  | 2.6    | 25         | 2                |               |        |         |            |                  |   |
| High   | 39            | 0.052  | 1.51   | 30         | 1                | 40            | 0.293  | 19.8    | 33         | 2                |   |
|        | 41            | 0.177  | 10.8   | 35         | 2                | 42            | 0.0039 | 1.34    | 40         | 2                |   |
|        | 43            | 0.0014 | 0.85   | 50         | 2                | 44            | 0.0032 | 0.48    | 50         | 1                |   |
|        | 45            | 0.005  | 0.6    | 50         | 1                | 46            | 0.003  | 2.05    | 70         | 1                |   |
|        | 47            | 0.0055 | 0.99   | 80         | 2                |               |        |         |            |                  |   |

\*The units for urine MCP-1 and urine TGF- $\beta$  are nanograms per milligram urine creatinine.

<sup>†</sup>INF is the degree of interstitial inflammation; 1 and 2 indicate that the degree of interstitial inflammation is <25% and  $\geq$ 25%, respectively.
